# Supplementary material
Source: PubMed Central journal article supplement (PMC4802502)
Supplement: NIHMS715775-supplement-Author_addition_approval.pdf [file NIHMS715775-supplement-Author_addition_approval.pdf]

## Authorship Agreement Form

We agree with the addition of **Dr. Tiffany Thomas, Columbia University, New York, NY**, to the author list of our manuscript: "Supplementation of L-alanyl-L-glutamine and fish oil improves body composition and quality of life in patients with chronic heart failure" to be published in *Circulation:Heart Failure*.

|                          |                                                                                    |         |
|--------------------------|------------------------------------------------------------------------------------|---------|
| Christina Wu             | 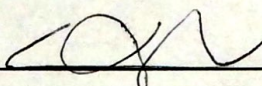  | 8-11-15 |
| Dr. Tomoko Kato          |  | 8/11/15 |
| Dr. Ruiping Ji           | Ruiping Ji                                                                         | 8/10/15 |
| Dr. Cynthia Zizola       | C. Zizola                                                                          | 8/11/15 |
| Dr. Danielle Brunjes     | Danielle Brunjes                                                                   | 8/10/15 |
| Lily Deng                | L. Deng                                                                            | 8/10/15 |
| Hirokazu Akashi          | H. Akashi                                                                          | 8.10.15 |
| Hilary F. Armstrong      | Hilary Armstrong                                                                   | 8/11/15 |
| Dr. Peter Kennel         | P. Kennel                                                                          | 8/10/15 |
| Dr. Daniel Forman        | Daniel Forman                                                                      | 8/10/15 |
| Jennifer Hall            | Jennifer Hall                                                                      | 8/11/15 |
| Dr. Aalap Chokshi        | A. Chokshi                                                                         | 8/10/15 |
| Dr. Matthew N. Bartels   | M. Bartels                                                                         | 8/11/15 |
| Dr. Donna M. Mancini     | D. Mancini                                                                         | 8/11/15 |
| Dr. David Seres          | D. Seres                                                                           | 8/10/15 |
| Dr. P. Christian Schulze | P. Schulze                                                                         | 8/10/15 |
