# Supplementary material
Source: PubMed Central journal article supplement (PMC4802502)
Supplement: NIHMS715775-supplement-Supplemental_Material.pdf [file NIHMS715775-supplement-Supplemental_Material.pdf]

**Supplemental Table 1. Muscle functional analysis of the dominant leg.**

| Variables – Dominant leg           | All HF Subjects<br>(n=31) | Placebo<br>(n=11) |          | Active<br>(n=14) |          |
|------------------------------------|---------------------------|-------------------|----------|------------------|----------|
|                                    | Baseline                  | Baseline          | Post     | Baseline         | Post     |
| <b>Isometric</b>                   |                           |                   |          |                  |          |
| Peak torque/BW – away (%)          | 189±9                     | 177±18            | 200±20   | 196±10           | 206±11   |
| Peak torque/BW –toward (%)         | 81±4                      | 76±6              | 90±8     | 90±5             | 90±5     |
| <b>Isokinetic – 5 repetitions</b>  |                           |                   |          |                  |          |
| Peak torque/BW – extension (%)     | 150±7                     | 147±17            | 173±20   | 153±8            | 160±9    |
| Peak torque/BW – flexion (%)       | 64±3                      | 61±6              | 76±9     | 70±5             | 77±4     |
| Work/BW – extension (%)            | 135±7                     | 132±15            | 157±17   | 137±8            | 149±9    |
| Work/BW – flexion (%)              | 64±5                      | 61±9              | 78±12    | 70±6             | 80±5     |
| Total work – extension (J)         | 506±36                    | 477±64            | 586±69   | 537±50           | 603±51   |
| Total work – flexion (J)           | 225±23                    | 209±35            | 277±44   | 264±36           | 319±33   |
| Average power – extension (W)      | 69±5                      | 65±10             | 80±9     | 75±33            | 84±7     |
| Average power – flexion (W)        | 28±3                      | 26±5              | 37±6     | 33±5             | 41±5     |
| Time to peak – extension (msec)    | 507±20                    | 526±44            | 404±37   | 494±27           | 456±27   |
| Time to peak – flexion (msec)      | 920±67                    | 828±104           | 729±45   | 945±84           | 780±93   |
| <b>Isokinetic – 25 repetitions</b> |                           |                   |          |                  |          |
| Peak torque/BW – extension (%)     | 103±5                     | 103±10            | 115±10   | 105±7            | 108±6    |
| Peak torque/BW – flexion (%)       | 76±16                     | 55±5              | 58±4     | 96±33            | 67±3     |
| Work/BW – extension (%)            | 99±6                      | 100±11            | 111±11   | 102±7            | 108±7    |
| Work/BW – flexion (%)              | 43±3                      | 41±6              | 51±6     | 46±6             | 55±4     |
| Total work – extension (J)         | 1622±122                  | 1551±200          | 1806±176 | 1776±185         | 1816±168 |
| Total work – flexion (J)           | 627±71                    | 552±102           | 765±99   | 742±118          | 813±99   |
| Average power – extension (W)      | 111±9                     | 106±14            | 128±13   | 121±13           | 140±15   |
| Average power – flexion (W)        | 39±5                      | 26±7              | 50±7     | 46±7             | 56±7     |
| Time to peak – extension (msec)    | 214±17                    | 195±12            | 186±12   | 212±27           | 177±12   |
| Time to peak – flexion (msec)      | 498±28                    | 399±61            | 366±53   | 546±11           | 507±32   |

Post represents 3 months following the intervention. Values expressed at Mean ± SEM

**Supplemental Table 2. Muscle functional analysis of the dominant arm.**

| Variables – Dominant arm           | All HF Subjects<br>(n=31) | Placebo<br>(n=10) |          | Active<br>(n=14) |        |
|------------------------------------|---------------------------|-------------------|----------|------------------|--------|
|                                    | Baseline                  | Baseline          | Post     | Baseline         | Post   |
| <b>Isometric</b>                   |                           |                   |          |                  |        |
| Peak torque/BW – away (%)          | 61±3                      | 65±6              | 64±6     | 59±4             | 61±4   |
| Peak torque/BW –toward (%)         | 72±3                      | 74±7              | 74±6     | 71±4             | 74±4   |
| <b>Isokinetic – 5 repetitions</b>  |                           |                   |          |                  |        |
| Peak torque/BW – extension (%)     | 43±2                      | 46±5              | 48±5     | 42±3             | 46±2   |
| Peak torque/BW – flexion (%)       | 57±3                      | 61±6              | 56±4     | 54±3             | 57±3   |
| Work/BW – extension (%)            | 49±3                      | 51±6              | 54±6     | 47±4             | 54±3   |
| Work/BW – flexion (%)              | 67±3                      | 70±7              | 68±5     | 65±4             | 71±4   |
| Total work – extension (J)         | 179±12                    | 189±23            | 209±26   | 184±19           | 193±18 |
| Total work – flexion (J)           | 257±16                    | 280±35            | 272±27   | 261±22           | 283±15 |
| Average power – extension (W)      | 22±2                      | 24±3              | 26±3     | 23±3             | 25±2   |
| Average power – flexion (W)        | 31±2                      | 35±4              | 34±4     | 32±3             | 34±2   |
| Time to peak – extension (msec)    | 428±33                    | 426±50            | 429±65   | 344±26           | 469±45 |
| Time to peak – flexion (msec)      | 917±54                    | 806±89            | 808±77   | 1003±76          | 996±80 |
| <b>Isokinetic – 25 repetitions</b> |                           |                   |          |                  |        |
| Peak torque/BW – extension (%)     | 36±2                      | 37±3              | 38±4     | 35±2             | 36±2   |
| Peak torque/BW – flexion (%)       | 53±2                      | 56±5              | 55±4     | 50±3             | 51±3   |
| Work/BW – extension (%)            | 37±2                      | 38±4              | 41±4     | 36±3             | 39±2   |
| Work/BW – flexion (%)              | 58±3                      | 63±6              | 60±5     | 55±3             | 58±3   |
| Total work – extension (J)         | 575±42                    | 590±72            | 655±83   | 612±65           | 598±50 |
| Total work – flexion (J)           | 989±62                    | 1108±141          | 1079±118 | 992±74           | 987±55 |
| Average power – extension (W)      | 35±3                      | 37±5              | 40±6     | 38±5             | 36±4   |
| Average power – flexion (W)        | 56±4                      | 64±9              | 62±8     | 57±5             | 57±4   |
| Time to peak – extension (msec)    | 407±33                    | 376±58            | 417±54   | 417±50           | 314±47 |
| Time to peak – flexion (msec)      | 451±29                    | 435±52            | 420±48   | 426±42           | 426±43 |

Post represents 3 months following the intervention. Values expressed at Mean ± SEM

**Supplemental Table 3. Muscle functional analysis of the non-dominant leg.**

| Variables – Non-dominant leg       | All HF Subjects<br>(n=29) | Placebo<br>(n=11) |          | Active<br>(n=13) |          |
|------------------------------------|---------------------------|-------------------|----------|------------------|----------|
|                                    | Baseline                  | Baseline          | Post     | Baseline         | Post     |
| <b>Isometric</b>                   |                           |                   |          |                  |          |
| Peak torque/BW – away (%)          | 173±46                    | 168±16            | 181±21   | 134±10           | 194±12   |
| Peak torque/BW –toward (%)         | 76±24                     | 73±8              | 83±8     | 83±6             | 88±7     |
| <b>Isokinetic – 5 repetitions</b>  |                           |                   |          |                  |          |
| Peak torque/BW – extension (%)     | 143±47                    | 144±16            | 166±20   | 143±11           | 157±9    |
| Peak torque/BW – flexion (%)       | 67±22                     | 66±6              | 71±7     | 72±5             | 75±5     |
| Work/BW – extension (%)            | 128±42                    | 130±13            | 144±17   | 129±11           | 145±8    |
| Work/BW – flexion (%)              | 67±26                     | 66±8              | 71±10    | 75±6             | 78±6     |
| Total work – extension (J)         | 490±36                    | 476±58            | 550±70   | 527±58           | 583±46   |
| Total work – flexion (J)           | 243±24                    | 226±35            | 261±41   | 290±36           | 310±35   |
| Average power – extension (W)      | 67±5                      | 65±9              | 78±11    | 73±8             | 82±6     |
| Average power – flexion (W)        | 31±3                      | 30±5              | 36±6     | 37±5             | 40±5     |
| <b>Isokinetic – 25 repetitions</b> |                           |                   |          |                  |          |
| Peak torque/BW – extension (%)     | 97±29                     | 100±10            | 110±11   | 100±7            | 106±6    |
| Peak torque/BW – flexion (%)       | 62±17                     | 60±4              | 57±5     | 67±5             | 68±5     |
| Work/BW – extension (%)            | 93±30                     | 94±9              | 104±11   | 97±8             | 106±6    |
| Work/BW – flexion (%)              | 47±19                     | 48±5              | 49±7     | 52±5             | 52±5     |
| Total work – extension (J)         | 1580±123                  | 1551±193          | 1766±215 | 1733±194         | 1825±146 |
| Total work – flexion (J)           | 700±78                    | 700±116           | 722±131  | 802±127          | 780±101  |
| Average power – extension (W)      | 109±9                     | 109±15            | 124±16   | 119±13           | 126±10   |
| Average power – flexion (W)        | 44±5                      | 46±8              | 47±9     | 49±8             | 48±7     |

Post represents 3 months following the intervention. Values expressed at Mean ± SEM

**Supplemental Table 4. Muscle functional analysis of the non-dominant arm.**

| Variables – Non-dominant arm       | All HF Subjects<br>(n=29) | Placebo<br>(n=11) |          | Active<br>(n=13) |        |
|------------------------------------|---------------------------|-------------------|----------|------------------|--------|
|                                    | Baseline                  | Baseline          | Post     | Baseline         | Post   |
| <b>Isometric</b>                   |                           |                   |          |                  |        |
| Peak torque/BW – away (%)          | 56±21                     | 53±6              | 63±8     | 56±5             | 61±4   |
| Peak torque/BW –toward (%)         | 67±19                     | 69±7              | 68±7     | 64±4             | 69±4   |
| <b>Isokinetic – 5 repetitions</b>  |                           |                   |          |                  |        |
| Peak torque/BW – extension (%)     | 41±14                     | 41±5              | 46±5     | 41±3             | 43±3   |
| Peak torque/BW – flexion (%)       | 55±16                     | 58±7              | 55±6     | 52±3             | 55±3   |
| Work/BW – extension (%)            | 45±17                     | 43±6              | 52±6     | 46±4             | 49±4   |
| Work/BW – flexion (%)              | 64±21                     | 65±6              | 66±6     | 63±5             | 66±4   |
| Total work – extension (J)         | 170±14                    | 159±24            | 197±26   | 187±22           | 194±16 |
| Total work – flexion (J)           | 249±18                    | 254±40            | 263±30   | 260±25           | 264±19 |
| Average power – extension (W)      | 23±2                      | 24±4              | 26±4     | 23±3             | 24±2   |
| Average power – flexion (W)        | 31±2                      | 35±5              | 34±5     | 31±3             | 33±3   |
| <b>Isokinetic – 25 repetitions</b> |                           |                   |          |                  |        |
| Peak torque/BW – extension (%)     | 34±9                      | 35±4              | 37±3     | 34±2             | 34±2   |
| Peak torque/BW – flexion (%)       | 51±13                     | 55±5              | 53±5     | 48±3             | 48±3   |
| Work/BW – extension (%)            | 34±14                     | 32±5              | 39±4     | 35±3             | 37±3   |
| Work/BW – flexion (%)              | 53±17                     | 53±6              | 59±6     | 52±4             | 54±3   |
| Total work – extension (J)         | 526±50                    | 508±85            | 614±92   | 583±78           | 553±72 |
| Total work – flexion (J)           | 901±70                    | 957±148           | 1010±115 | 921±99           | 933±78 |
| Average power – extension (W)      | 32±3                      | 33±6              | 39±6     | 35±5             | 34±5   |
| Average power – flexion (W)        | 49±4                      | 57±10             | 60±8     | 47±6             | 54±5   |

Post represents 3 months following the intervention. Values expressed at Mean ± SEM

**Supplemental Table 5. Lipidomic analysis of circulating fatty acid profiles.**

|                                                 | All Subjects | Placebo    |            |                          | Active     |                        |                        | Overall p-value |
|-------------------------------------------------|--------------|------------|------------|--------------------------|------------|------------------------|------------------------|-----------------|
|                                                 | Baseline     | Baseline   | 1 month    | 3 months                 | Baseline   | 1 month                | 3 months               |                 |
| <b>Total Free Fatty Acids</b>                   | 333.1±47.3   | 232.4±30.1 | 340.5±34.8 | 381.7±34.1               | 421.2±79.5 | 314.3±28.8             | 438.8±47.4             | 0.066           |
| <b>C14 Myristic Acid</b>                        | 10.9±1.7     | 7.8±1.6    | 9.0±1.2    | 15.6±3.3                 | 13.7±2.8   | 10.6±1.0               | 13.9±2.6               | 0.12            |
| <b>C16:1 Palmitoleic Acid</b>                   | 9.9±1.6      | 6.9±1.5    | 7.6±1.3    | 8.1±1.0                  | 12.5±2.6   | 8.9±1.0                | 13.7±2.6               | 0.074           |
| <b>C16 Palmitic Acid</b>                        | 72.4±10.8    | 49.0±6.9   | 63.7±7.5   | 70.5±6.3                 | 92.9±18.1  | 59.0±5.4               | 93.4±12.2              | 0.03            |
| <b>C18:3 <math>\alpha</math>-Linolenic Acid</b> | 8.3±1.4      | 5.3±0.9    | 5.8±1.1    | 8.1±1.4                  | 11.0±2.4   | 8.0±1.0                | 12.0±1.6               | 0.04            |
| <b>C18:2 Linoleic Acid</b>                      | 76.2±9.4     | 57.3±6.8   | 114.6±13   | 128.6±17.8* <sup>#</sup> | 92.8±15.6  | 60.1±7.3* <sup>#</sup> | 94.0±10.4              | 0.0005          |
| <b>C18:1 Oleic Acid</b>                         | 100.6±15.8   | 67.1±9.6   | 86.7±11.5  | 95.4±8.9                 | 129.9±26.7 | 88.0±13.3              | 124.8±15.6             | 0.06            |
| <b>C18 Stearic Acid</b>                         | 35.8±6.7     | 24.2±3.2   | 33.3±2.8   | 35.1±3                   | 46.0±11.9  | 25.7±2.1               | 43.4±5.2               | 0.09            |
| <b>C20:5 Eicosapentaenoic Acid</b>              | 0.96±0.2     | 0.6±0.1    | 0.47±0.07  | 0.83±0.2                 | 1.3±0.3    | 10.3±0.6* <sup>#</sup> | 7.3±1.5*               | <0.0001         |
| <b>C20:4 Arachidonic Acid</b>                   | 8.9±0.6      | 8.1±0.7    | 10.1±1.2   | 9.4±0.9                  | 9.7±0.9    | 8.8±0.5                | 10.0±1.0               | 0.56            |
| <b>C20:1 Eicosenoic Acid</b>                    | 1.7±0.6      | 0.87±0.1   | 1.1±0.14   | 1.7±0.5                  | 2.4±1.1    | 4.7±0.7* <sup>#</sup>  | 3.8±0.8*               | 0.002           |
| <b>C20 Arachidic Acid</b>                       | 0.58±0.2     | 0.34±0.03  | 0.5±0.06   | 0.58±0.1                 | 0.79±0.3   | 0.54±0.02              | 0.6±0.1                | 0.51            |
| <b>C22:6 Docosahexaenoic Acid</b>               | 4.7±0.6      | 3.7±0.5    | 3.8±0.4    | 5.3±1.0                  | 5.6±0.9    | 22.7±2.0* <sup>#</sup> | 18.1±3.3* <sup>#</sup> | <0.0001         |
| <b>C22:1 Erucic Acid</b>                        | 0.58±0.4     | 0.17±0.05  | 0.08±0.009 | 0.55±0.5                 | 0.94±0.8   | 3.7±0.7* <sup>#</sup>  | 1.9±0.8* <sup>#</sup>  | 0.0003          |
| <b>C22 Behenic Acid</b>                         | 0.34±0.07    | 0.23±0.02  | 0.35±0.04  | 0.41±0.06                | 0.45±0.1   | 0.43±0.03              | 0.37±0.04              | 0.20            |
| <b>C24:1 Nervonic Acid</b>                      | 0.49±0.1     | 0.39±0.07  | 0.71±0.06  | 0.85±0.2                 | 0.57±0.2   | 2.1±0.3* <sup>#</sup>  | 1.1±0.2*               | <0.0001         |
| <b>C24 Lignoceric Acid</b>                      | 0.58±0.08    | 0.47±0.04  | 0.74±0.09  | 0.76±0.1                 | 0.67±0.1   | 0.78±0.2               | 0.56±0.05              | 0.24            |

\*p<0.5 vs. baseline; <sup>#</sup>p<0.05 between groups; concentration of all fatty acid species in  $\mu$ M.

Values expressed at Mean  $\pm$  SEM

**Supplemental Table 6. Lipidomic analysis of circulating ceramide profiles.**

|                        | All Subjects | Placebo     |             |             | Active      |              |             | Overall p-value |
|------------------------|--------------|-------------|-------------|-------------|-------------|--------------|-------------|-----------------|
|                        | Baseline     | Baseline    | 1 month     | 3 months    | Baseline    | 1 month      | 3 months    |                 |
| <b>Total ceramides</b> | 5.5±0.3      | 5.5±0.4     | 5.2±0.4     | 5.1±0.5     | 5.5±0.4     | 4.2±0.16     | 5.13±0.5    | 0.16            |
| <b>C14</b>             | 0.008±0.0009 | 0.009±0.002 | 0.007±0.002 | 0.008±0.002 | 0.007±0.001 | 0.008±0.001  | 0.007±0.001 | 0.76            |
| <b>C16:1</b>           | 0.11±0.008   | 0.11±0.009  | 0.1±0.01    | 0.1±0.01    | 0.11±0.01   | 0.08±0.006   | 0.09±0.008  | 0.06            |
| <b>C16</b>             | 0.32±0.02    | 0.3±0.03    | 0.27±0.02   | 0.29±0.02   | 0.33±0.03   | 0.25±0.01    | 0.29±0.03   | 0.24            |
| <b>C18:1</b>           | 0.06±0.006   | 0.06±0.005  | 0.05±0.009  | 0.04±0.008  | 0.06±0.01   | 0.05±0.002   | 0.06±0.008  | 0.37            |
| <b>C18</b>             | 0.14±0.01    | 0.13±0.02   | 0.11±0.01   | 0.11±0.007  | 0.14±0.02   | 0.11±0.01    | 0.15±0.03   | 0.49            |
| <b>C20:1</b>           | 0.01±0.001   | 0.01±0.002  | 0.01±0.003  | 0.01±0.002  | 0.01±0.002  | 0.006±0.0006 | 0.006±0.001 | 0.054           |
| <b>C20</b>             | 0.012±0.001  | 0.01±0.001  | 0.01±0.002  | 0.01±0.002  | 0.01±0.001  | 0.01±0.001   | 0.01±0.002  | 0.66            |
| <b>C22:1</b>           | 0.07±0.02    | 0.06±0.006  | 0.06±0.008  | 0.06±0.01   | 0.08±0.01   | 0.04±0.003   | 0.06±0.008  | 0.03            |
| <b>C22</b>             | 0.25±0.02    | 0.25±0.02   | 0.21±0.02   | 0.23±0.03   | 0.26±0.04   | 0.17±0.01    | 0.25±0.04   | 0.30            |
| <b>C24:1</b>           | 1.3±0.06     | 1.27±0.08   | 1.19±0.12   | 1.16±0.12   | 1.33±0.1    | 1.13±0.03    | 1.32±0.11   | 0.56            |
| <b>C24</b>             | 3.22±0.16    | 3.27±0.24   | 3.17±0.21   | 3.02±0.27   | 3.17±0.22   | 2.8±0.21     | 2.89±0.3    | 0.71            |

Concentration of all fatty acid species in  $\mu\text{M}$ . Values expressed at Mean  $\pm$  SEM

**Supplemental Table 7. Analysis of circulating amino acid profiles.**

|                      | All Subjects | Placebo  |          |           | Active   |          |          | Overall<br>p-value |
|----------------------|--------------|----------|----------|-----------|----------|----------|----------|--------------------|
|                      | Baseline     | Baseline | 1 month  | 3 months  | Baseline | 1 month  | 3 months |                    |
| <b>Glutamate</b>     | 42.7±3.2     | 43.8±4.3 | 46.6±7.2 | 58.8±11.0 | 41.8±4.8 | 48.4±6.5 | 41.1±4.7 | 0.49               |
| <b>H-Proline</b>     | 23.6±2.5     | 25.7±3.6 | 25.8±4.1 | 24.0±5.1  | 21.8±3.4 | 22.4±4.6 | 18.1±2.3 | 0.71               |
| <b>Serine</b>        | 86.8±4.7     | 90.2±6.3 | 87.6±6.4 | 81.6±3.9  | 84.0±6.8 | 84.5±6.7 | 86.3±4.4 | 0.96               |
| <b>Asparagine</b>    | 40.4±2.0     | 40.6±2.1 | 42.8±3.8 | 42.1±4.2  | 40.2±3.3 | 40.2±3.1 | 39.1±2.6 | 0.97               |
| <b>Glycine</b>       | 225±10       | 249±11   | 245±14   | 219±15    | 205±13   | 233±19   | 216±17   | 0.24               |
| <b>Glutamine</b>     | 528±16       | 548±24   | 567±32   | 510±36    | 511±21   | 556±38   | 530±28   | 0.68               |
| <b>Taurine</b>       | 112±9        | 129±18   | 118±18   | 140±29    | 98±7     | 102±9    | 85±10    | 0.11               |
| <b>Histidine</b>     | 86.4±3.4     | 93.6±5.1 | 91.9±4.4 | 92.6±3.7  | 80.4±4   | 85.9±6.3 | 81.4±3.9 | 0.18               |
| <b>Citrulline</b>    | 33.3±2.6     | 39.4±3.9 | 41.1±3.2 | 34.0±3.5  | 28.2±3.1 | 32.6±3.6 | 27.1±3.9 | 0.03               |
| <b>Threonine</b>     | 113±10       | 127±16   | 117±8.5  | 114±8.6   | 102±12   | 96±7     | 94±6     | 0.20               |
| <b>Alanine</b>       | 511±27       | 498±29   | 525±36   | 461±48    | 521±45   | 629±48   | 556±48   | 0.17               |
| <b>Arginine</b>      | 62.3±4.6     | 67.5±7.9 | 76.1±5.9 | 72.0±8.0  | 58.0±5.3 | 65.6±3.9 | 61.5±7.5 | 0.38               |
| <b>Proline</b>       | 308±22       | 323±33   | 312±24   | 277±24    | 295±29   | 322±28   | 295±30   | 0.89               |
| <b>Tyrosine</b>      | 86.9±4.2     | 97.5±6.4 | 91.9±5.7 | 90.2±4.4  | 78.2±4.6 | 85.5±5.3 | 86.4±7.9 | 0.25               |
| <b>Valine</b>        | 279±10       | 284±17   | 282±15   | 283±21    | 275±12   | 293±26   | 293±17   | 0.98               |
| <b>Methionine</b>    | 33.6±2.4     | 35.5±3.3 | 37.6±2.9 | 36.0±3.8  | 31.9±3.5 | 34.4±2.7 | 34.2±3.2 | 0.87               |
| <b>Cystine</b>       | 16.6±1.5     | 19.9±1.9 | 17.9±2.2 | 16.6±3.0  | 13.8±1.9 | 18.1±2.4 | 14.1±1.5 | 0.24               |
| <b>Isoleucine</b>    | 82.1±4.8     | 85.6±8.0 | 87.2±7.5 | 90.2±11.1 | 79.2±5.9 | 86.8±8.5 | 87.6±9.1 | 0.95               |
| <b>Leucine</b>       | 143±6.9      | 149±12   | 146±10   | 150±16    | 138±8    | 145±13   | 153±13   | 0.95               |
| <b>Phenylalanine</b> | 79.6±3.1     | 84.5±5.2 | 80.7±4.1 | 82.7±4.1  | 75.6±3.6 | 83.6±6.1 | 81.8±6.2 | 0.80               |
| <b>Tryptophan</b>    | 59.7±3.0     | 67.2±4.8 | 61.5±6.1 | 65.6±6.1  | 53.5±3.2 | 58.8±4.5 | 58.0±4.3 | 0.36               |
| <b>Ornithine</b>     | 77.4±3.7     | 87.1±5.3 | 89.9±7.1 | 80.0±7.8  | 69.5±4.3 | 75.6±6.1 | 73.3±8.9 | 0.17               |
| <b>Lysine</b>        | 183±7        | 194±9    | 213±15   | 206±16    | 174±9    | 201±18   | 187±14   | 0.34               |

Concentration of all amino acid species in umol/l. Values expressed at Mean ± SEM

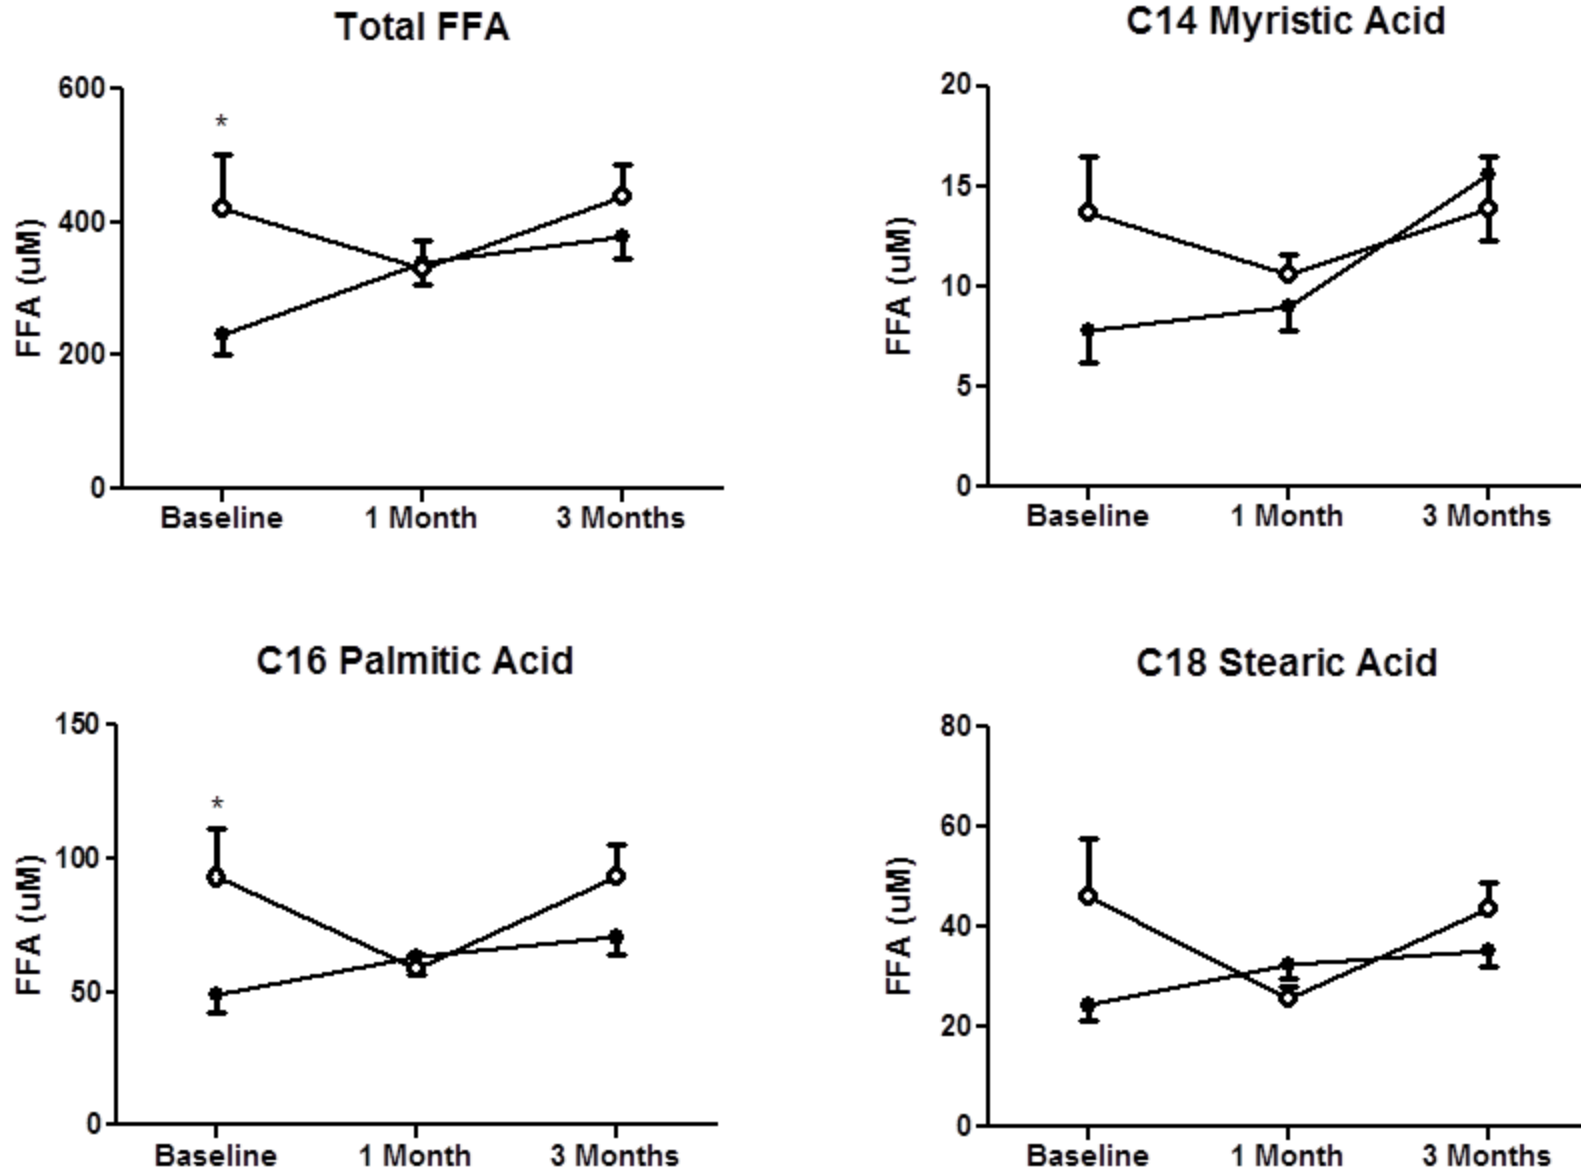

Supplemental Figure 1A. Dynamics in circulating total, saturated and unsaturated fatty acid levels. Open circles = active treatment, closed circles = placebo treatment.



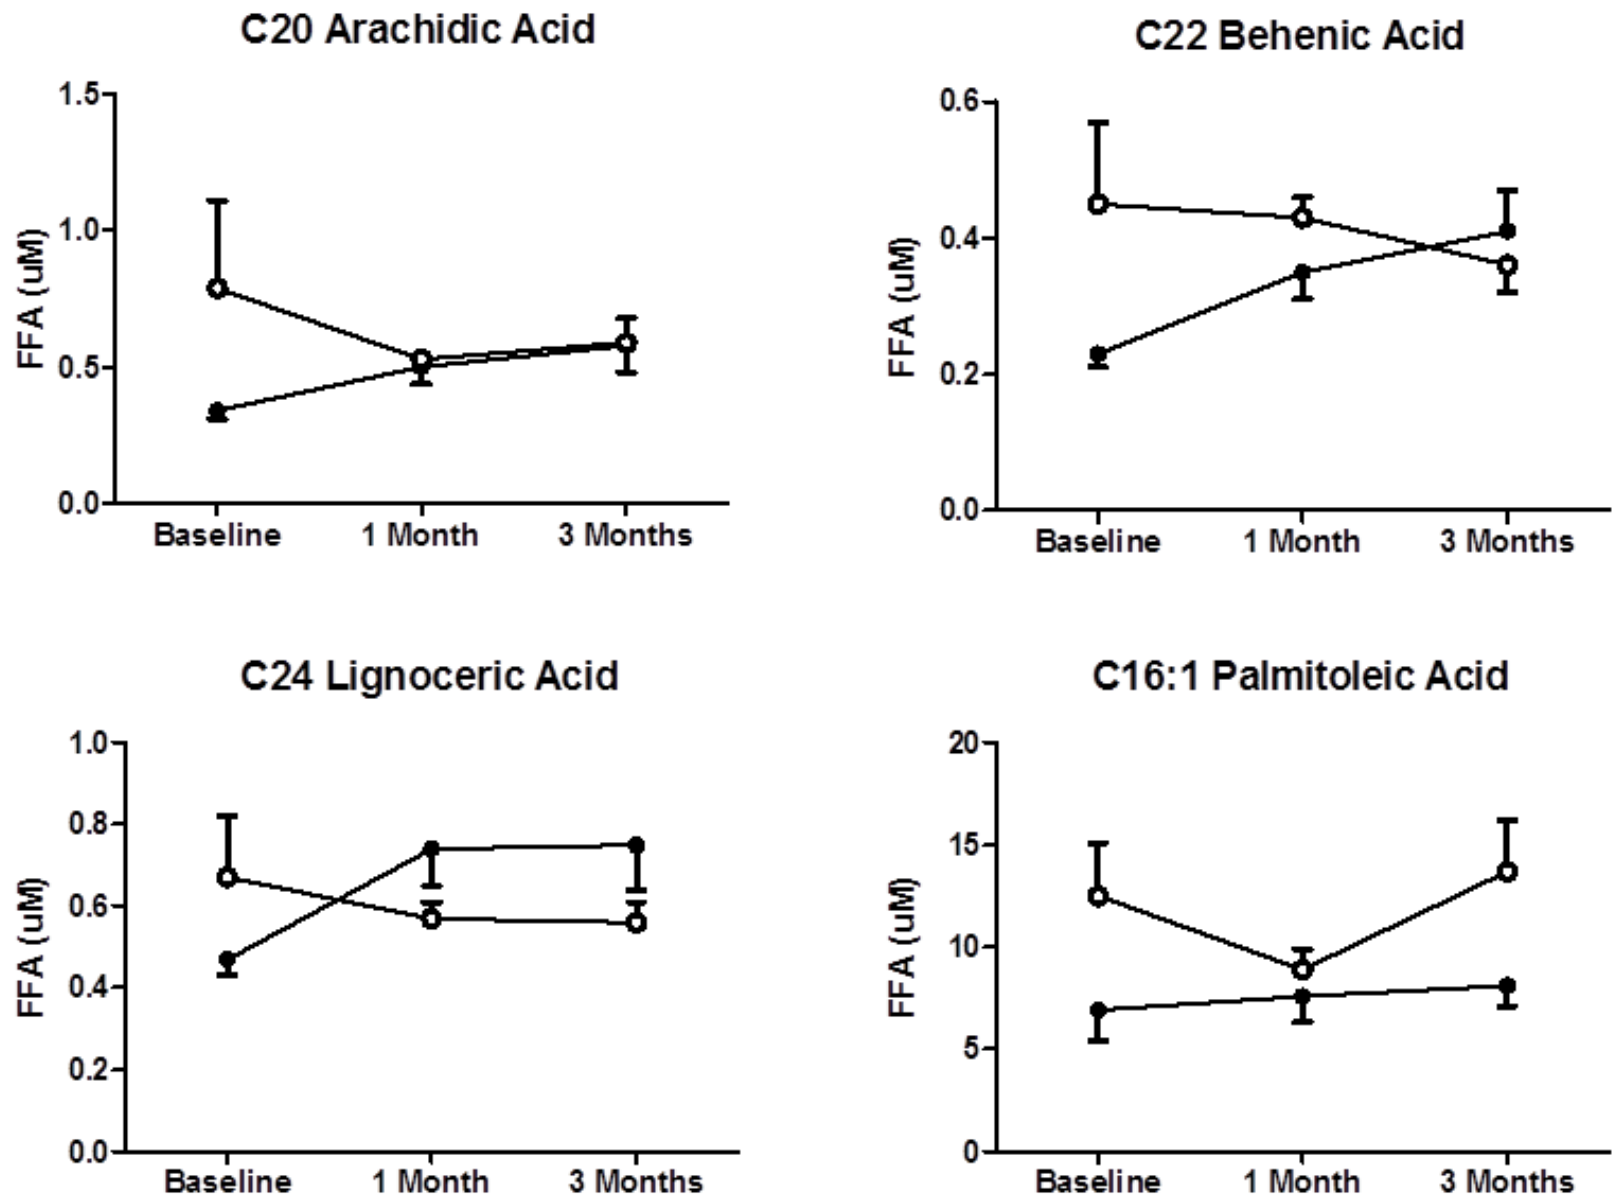

Supplemental Figure 1B. Dynamics in circulating total, saturated and unsaturated fatty acid levels. Open circles = active treatment, closed circles = placebo treatment.

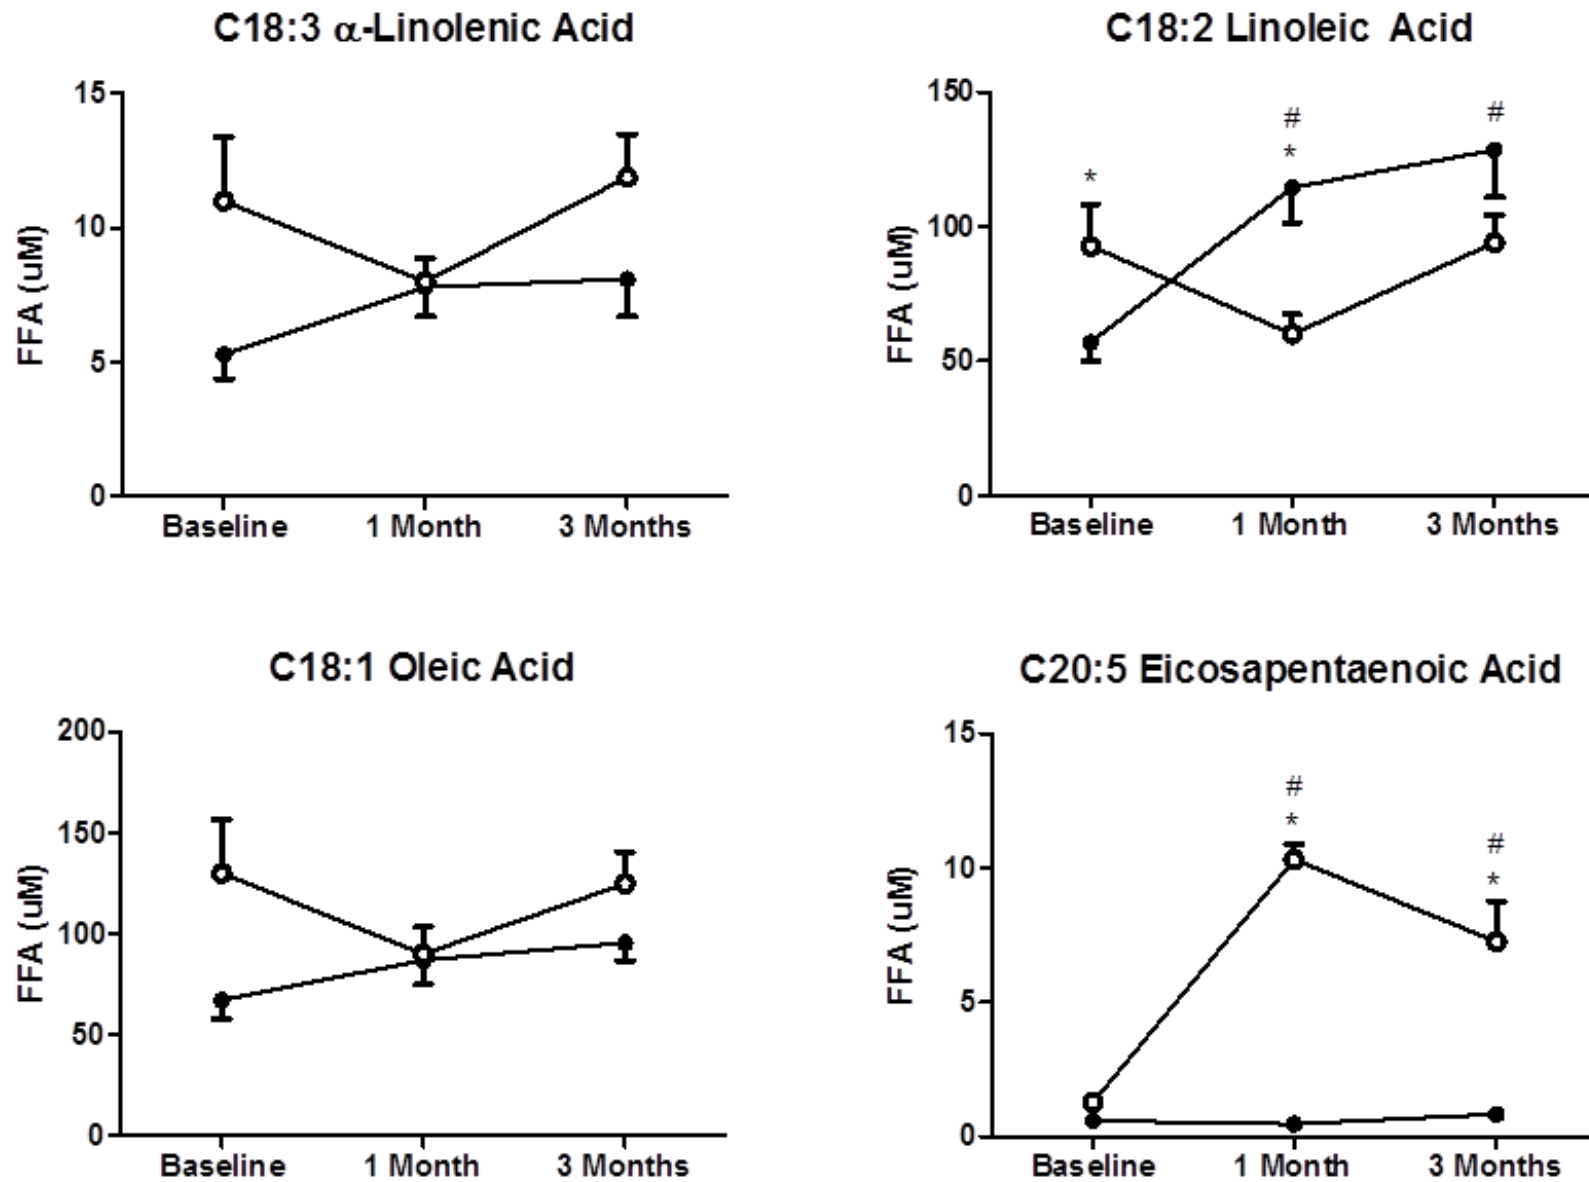

Supplemental Figure 1C. Dynamics in circulating total, saturated and unsaturated fatty acid levels. Open circles = active treatment, closed circles = placebo treatment.

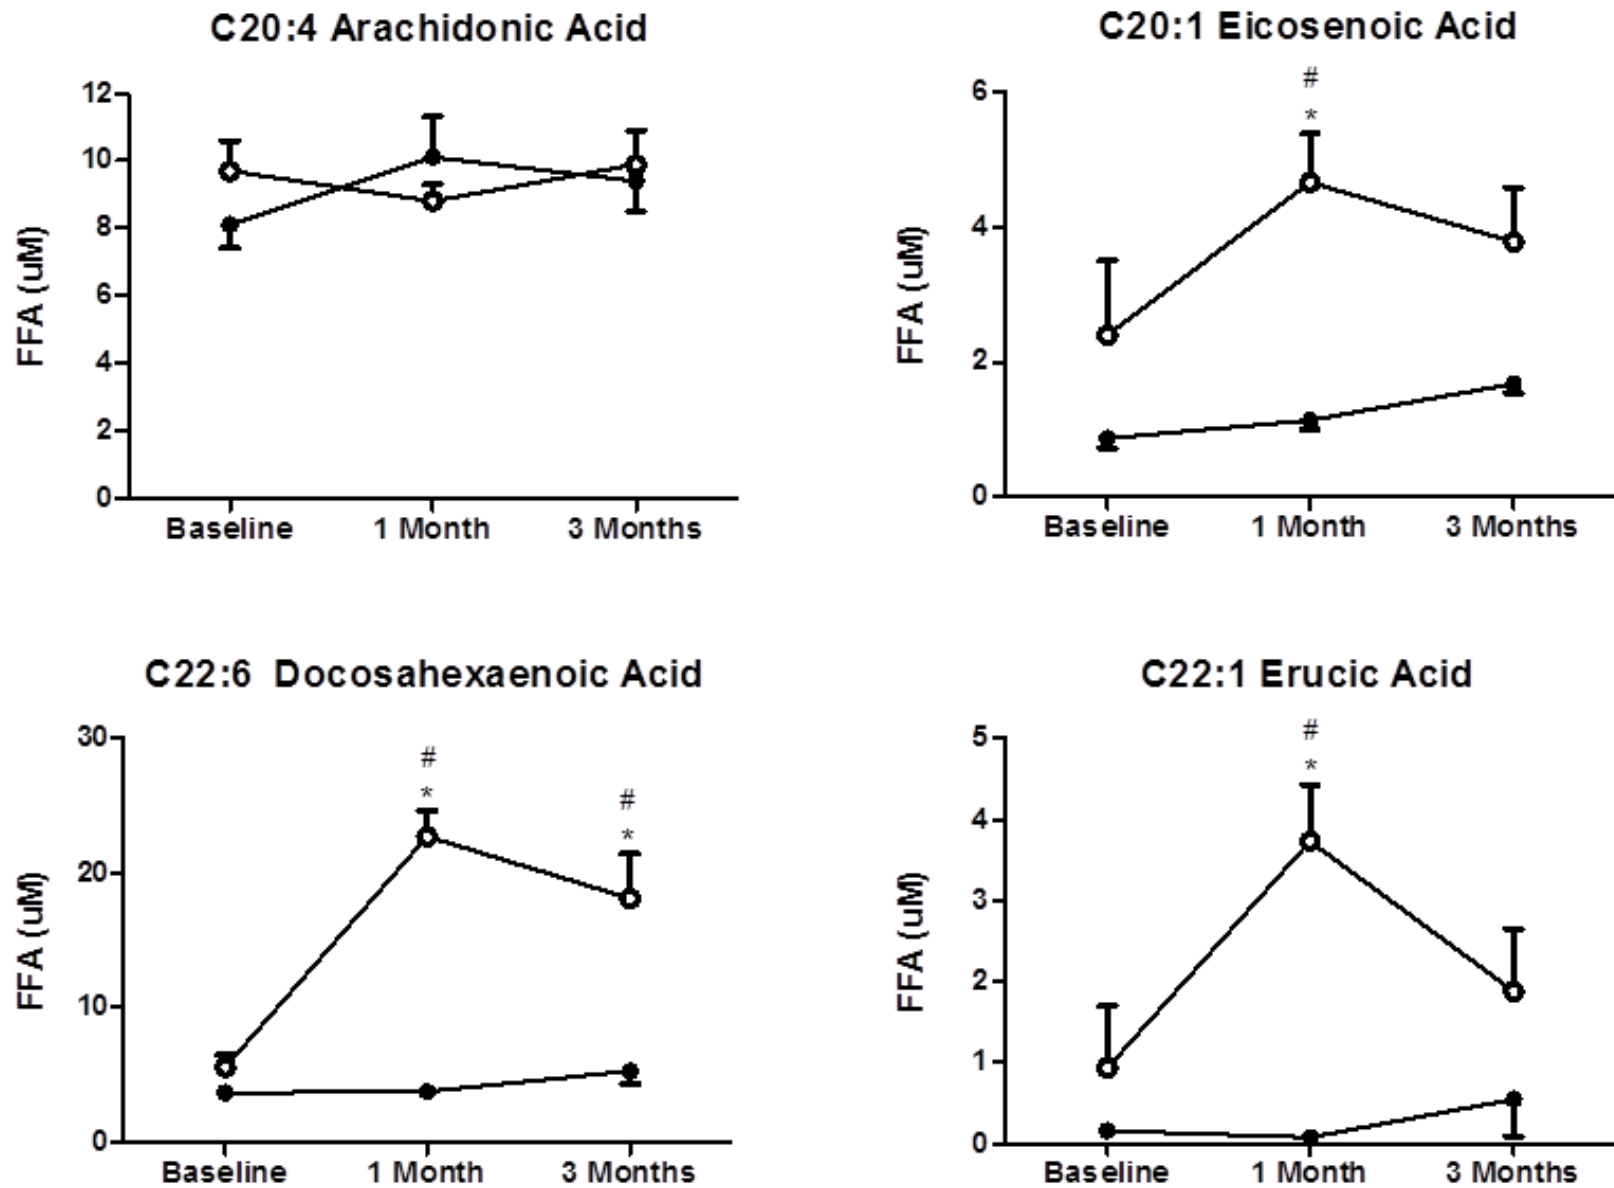

Supplemental Figure 1D. Dynamics in circulating total, saturated and unsaturated fatty acid levels. Open circles = active treatment, closed circles = placebo treatment.

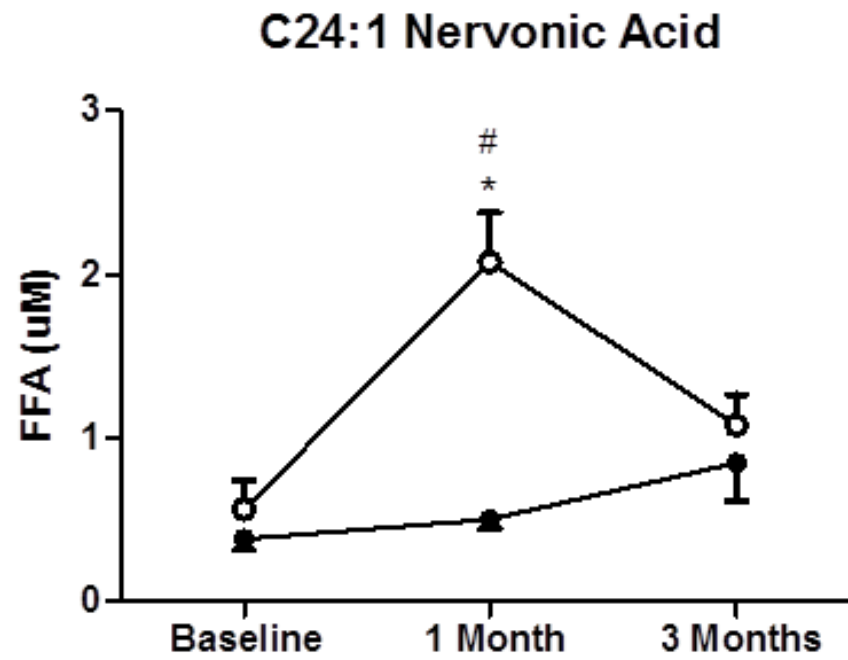

Supplemental Figure 1E. Dynamics in circulating total, saturated and unsaturated fatty acid levels. Open circles = active treatment, closed circles = placebo treatment.

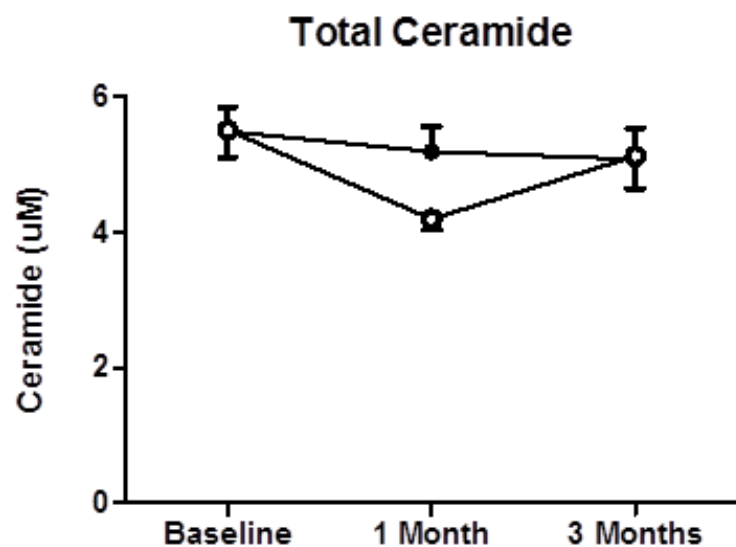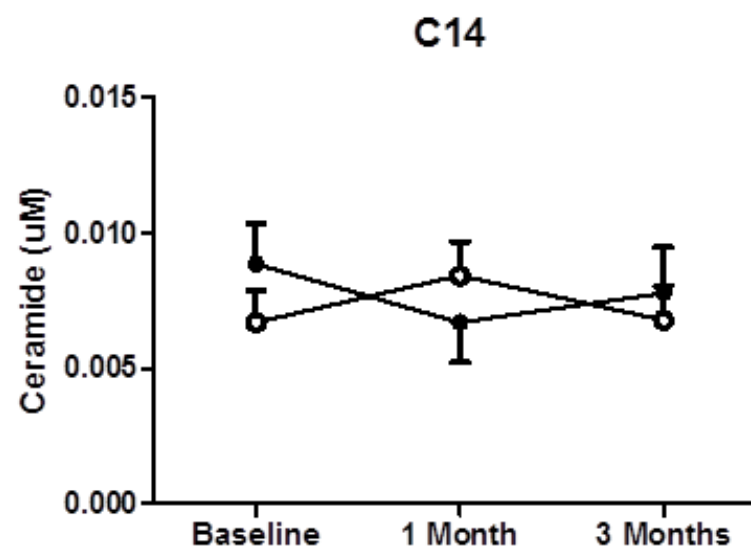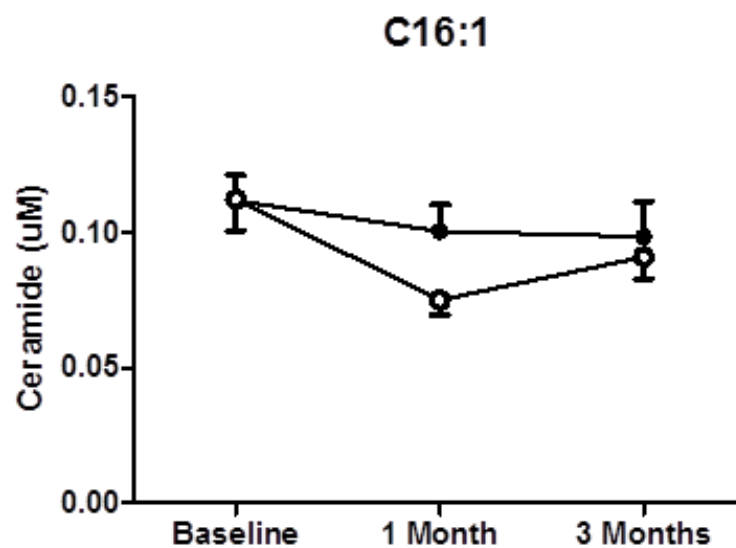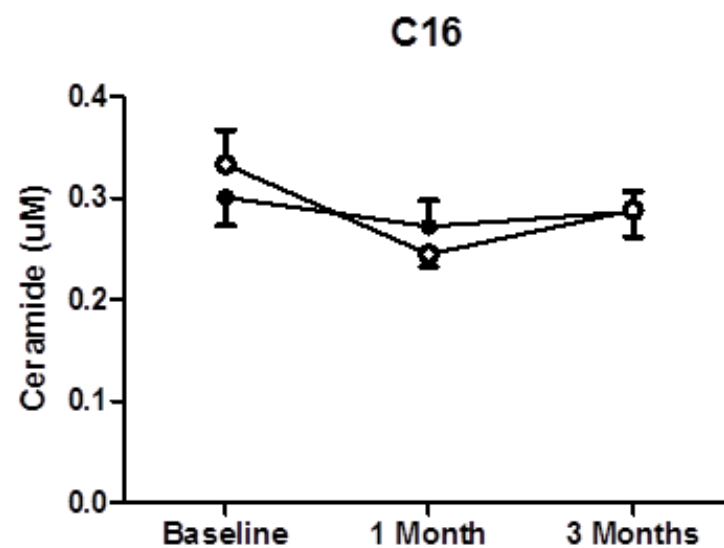

**Supplemental Figure 2A. Dynamics in total and individual circulating ceramide species. Open circles = active treatment, closed circles = placebo treatment.**

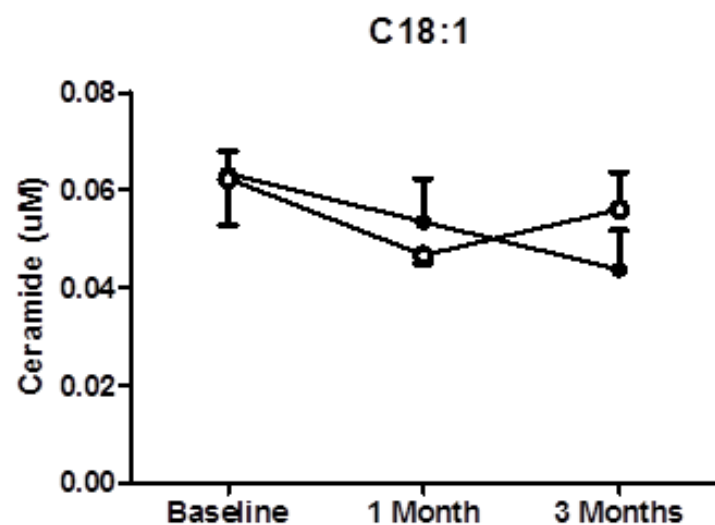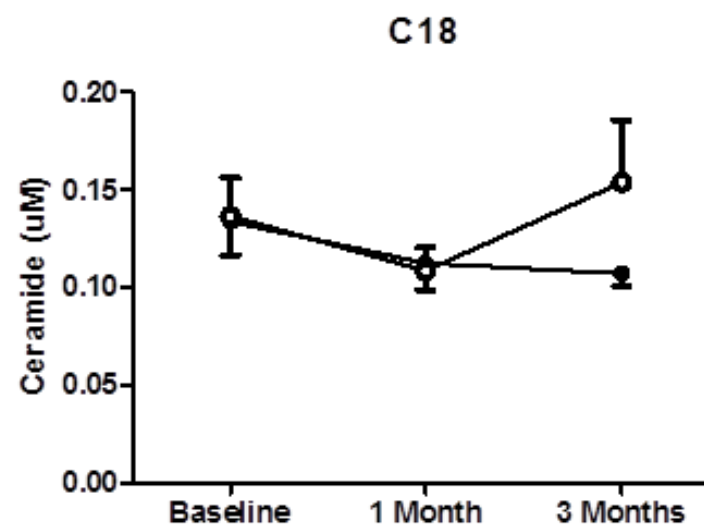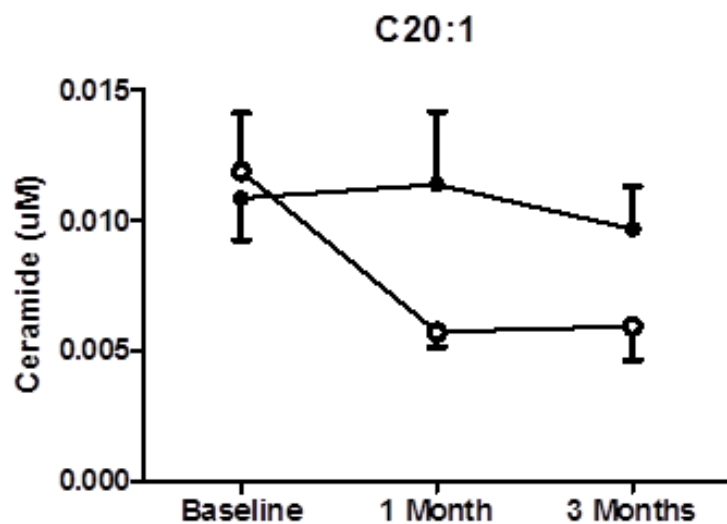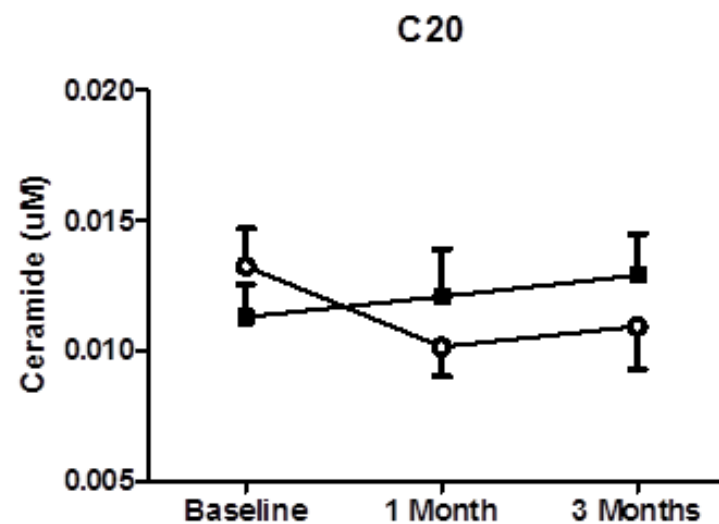

**Supplemental Figure 2B. Dynamics in total and individual circulating ceramide species. Open circles = active treatment, closed circles = placebo treatment.**

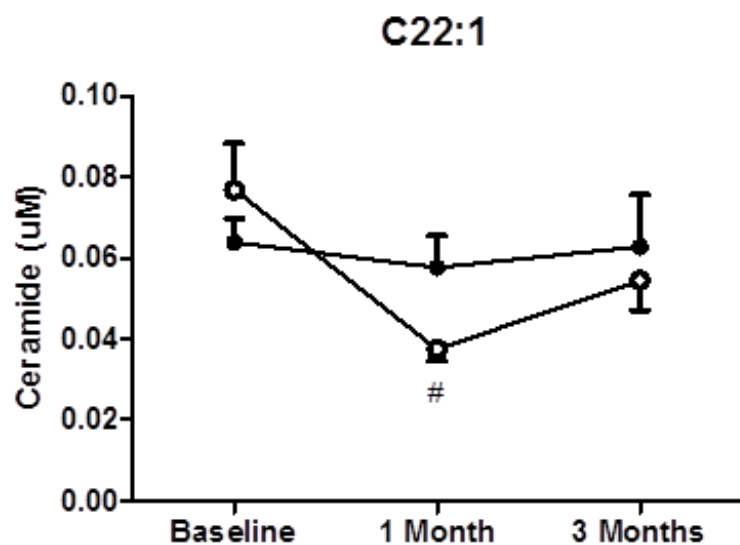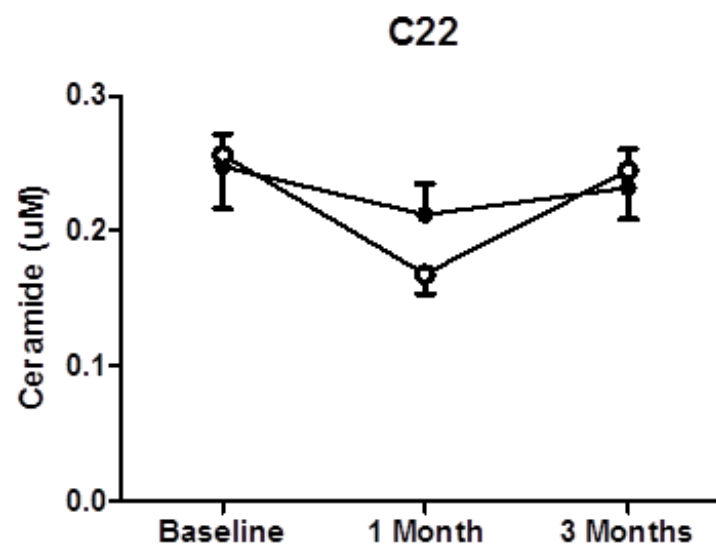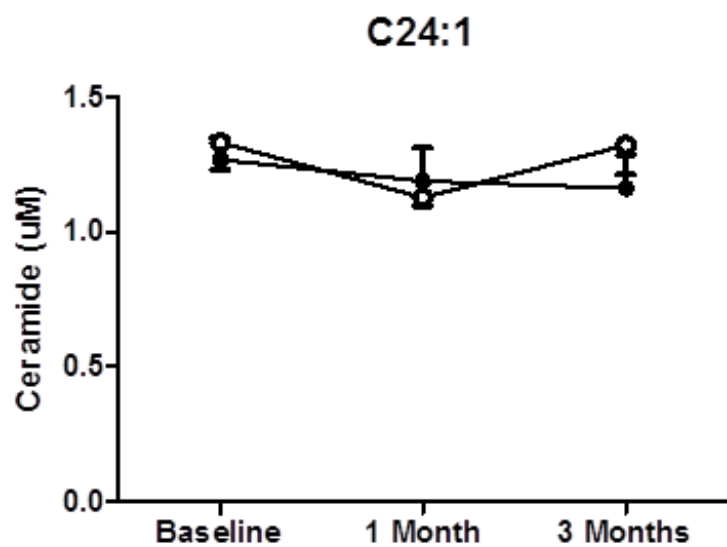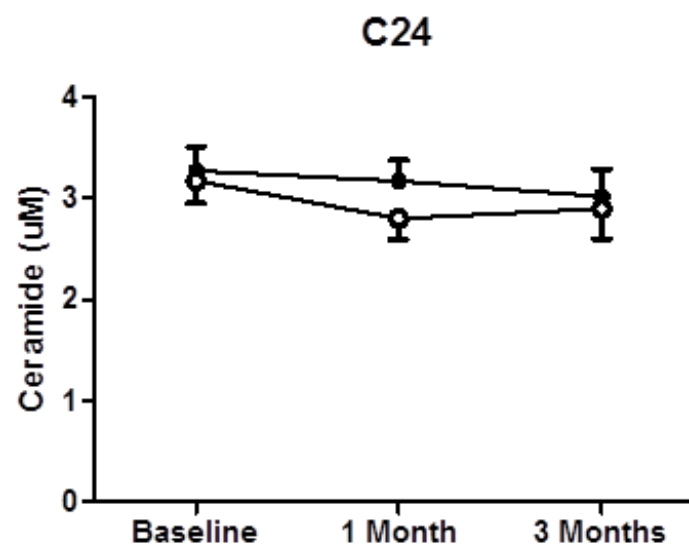

**Supplemental Figure 2C. Dynamics in total and individual circulating ceramide species. Open circles = active treatment, closed circles = placebo treatment.**
